# Supplementary material for: White light emitting silsesquioxane based materials: the importance of a ligand with rigid and directional arms
Source: Royal Society of Chemistry journal article supplement (doi:10.1039/d1ma00801c), 2021-11-04
Supplement: d1ma00801c1.pdf [file d1ma00801c1.pdf]

# White Light Emitting Silsesquioxane Based Materials: the Importance of a Ligand with Rigid and Directional Arms

*Andrea Santiago-Portillo,<sup>a</sup> Valerio Cinà,<sup>a,b</sup> Esther Carbonell,<sup>a</sup> Luca Fusaro,<sup>a</sup> Vincent Lemaur,<sup>c</sup> Roberto Lazzaroni,<sup>c</sup> Michelangelo Gruttadauria,<sup>b</sup> Francesco Giacalone,<sup>\*b</sup> Carmela Aprile <sup>\*a</sup>*

<sup>a</sup> Unit of Nanomaterial Chemistry (CNano), Department of Chemistry, University of Namur, Rue de Bruxelles 61, 5000, Namur, Belgium.

<sup>b</sup> Department of Biological, Chemical and Pharmaceutical Sciences and Technologies, University of Palermo, Viale delle Scienze, Ed.17, 90128, Palermo, Italy.

<sup>c</sup> Laboratory for Chemistry of Novel Materials, Materials Research Institute, University of Mons-UMONS, Place du Parc 20, Mons B-7000, Belgium.

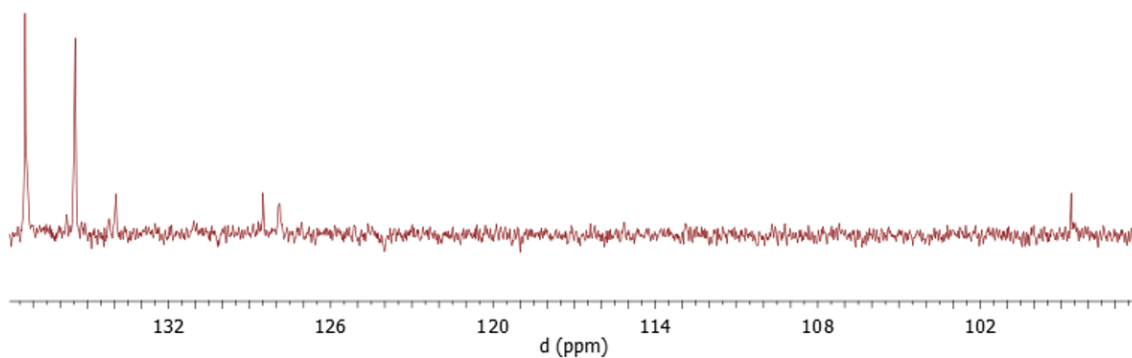

**Figure S1.**  $^{13}\text{C}$  NMR spectrum of I-POSS (101 MHz, THF).

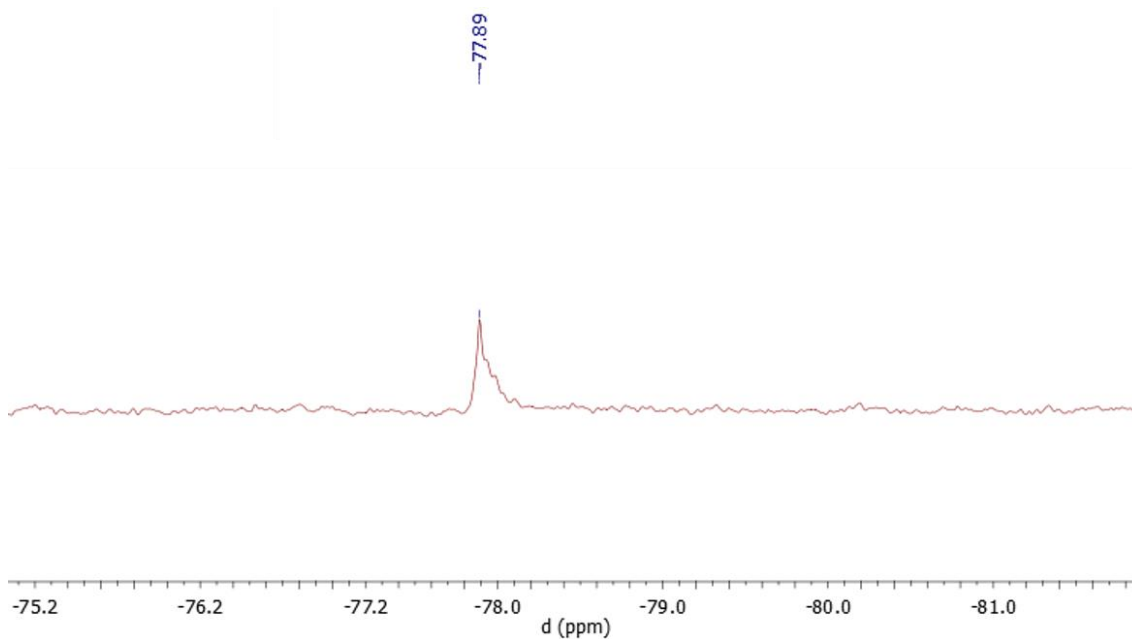

**Figure S2.**  $^{29}\text{Si}$  NMR spectrum of I-POSS (79 MHz, THF).

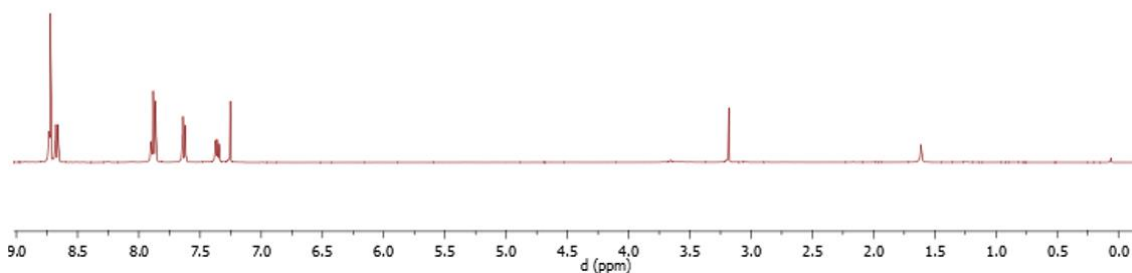

**Figure S3.**  $^1\text{H}$  NMR spectrum of 4'-(4-Ethynylphenyl)-[2,2':6,2'']terpyridine (300 MHz,  $\text{CDCl}_3$ ).

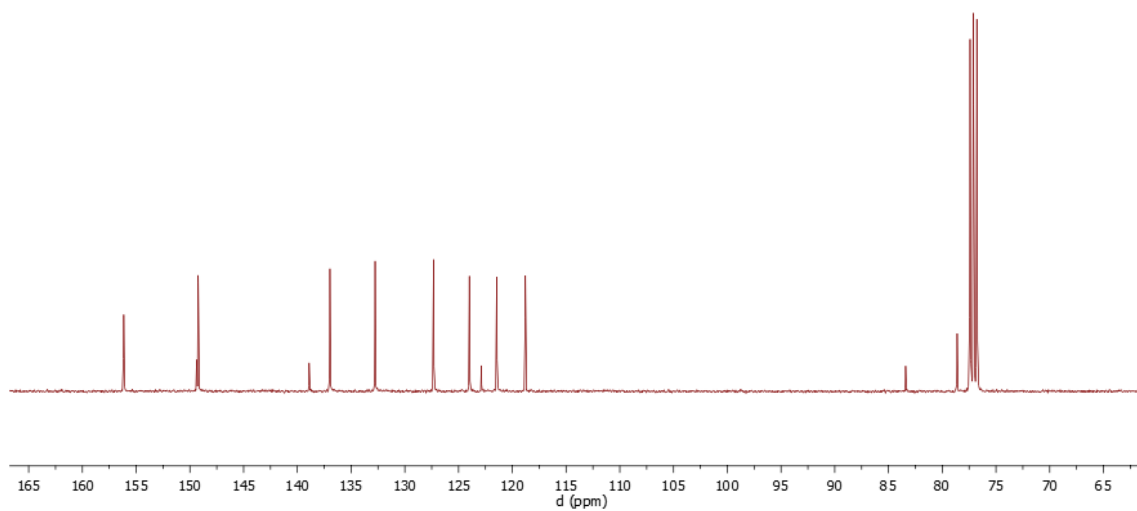

**Figure S4.**  $^{13}\text{C}$  NMR spectrum ( $\text{CDCl}_3$ ) of 4'-(4-Ethynylphenyl)-[2,2':6,2'']terpyridine (101 MHz,  $\text{CDCl}_3$ ).

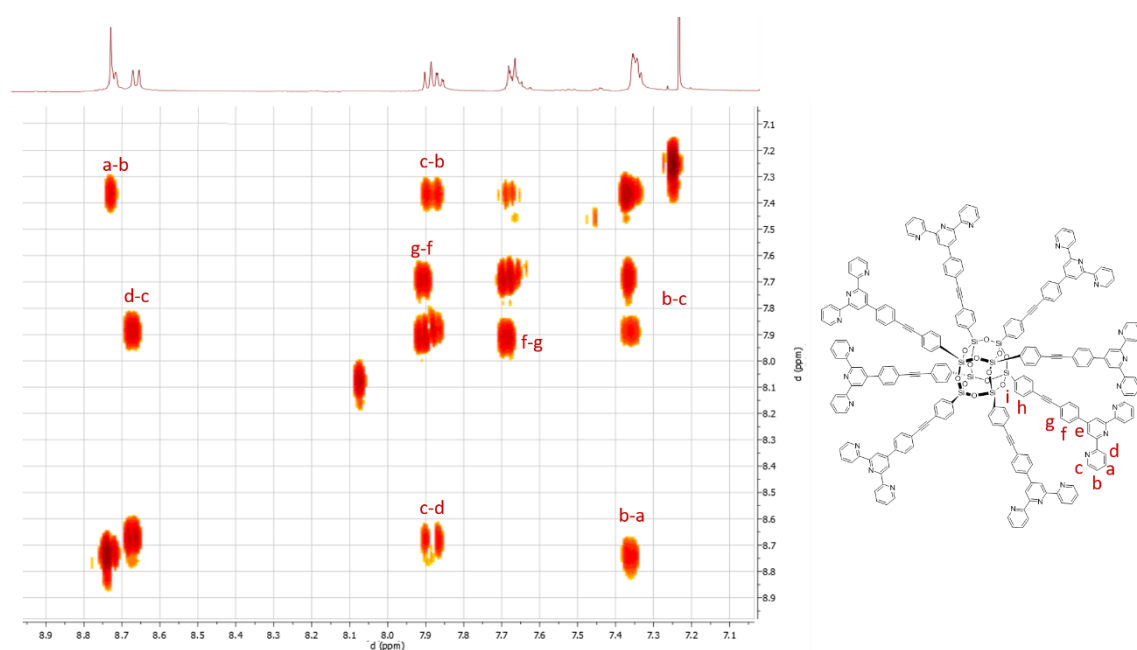

**Figure S5.** COSY NMR spectrum ( $\text{CDCl}_3$ ) of Ter-POSS.

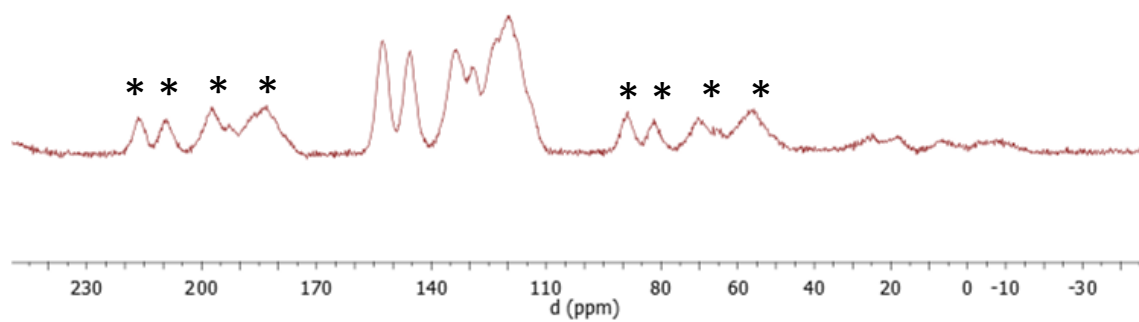

**Figure S6.** CP-MAS  $^{13}\text{C}$  NMR spectrum of Ter-POSS in solid-state (125 MHz, 8kHz). Asterisks denote spinning sidebands.

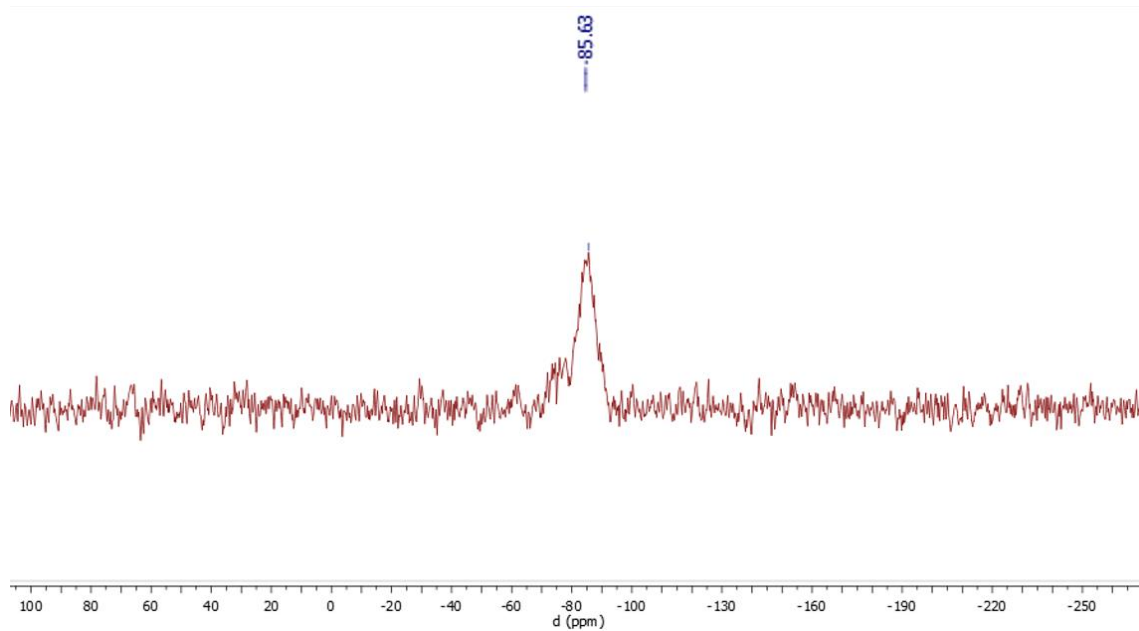

**Figure S7.** CP-MAS  $^{29}\text{Si}$  NMR spectrum of Ter-POSS in solid-state (99.3 MHz, 8kHz).

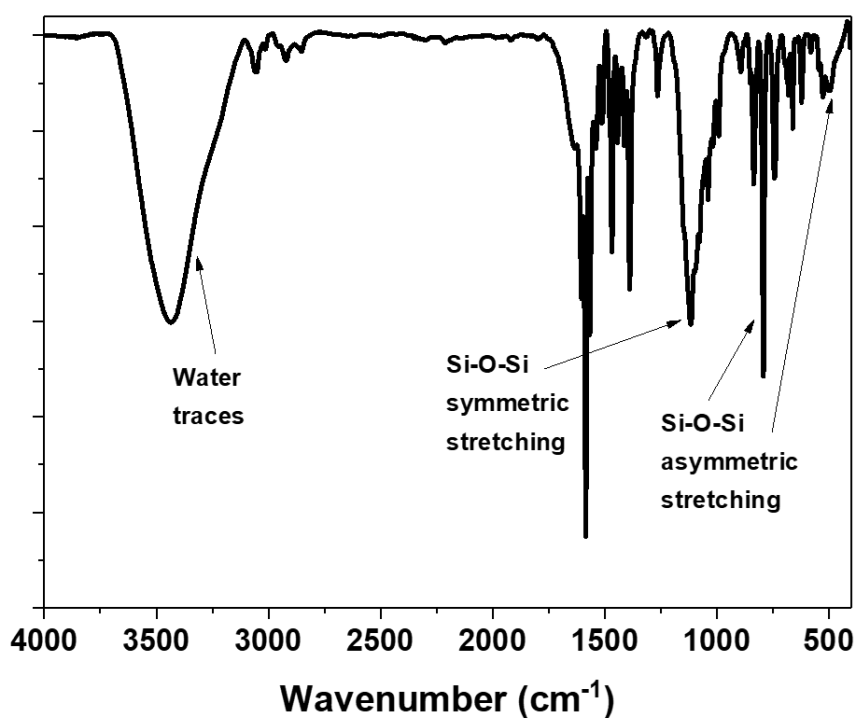

**Figure S8.** IR spectrum Ter-POSS.

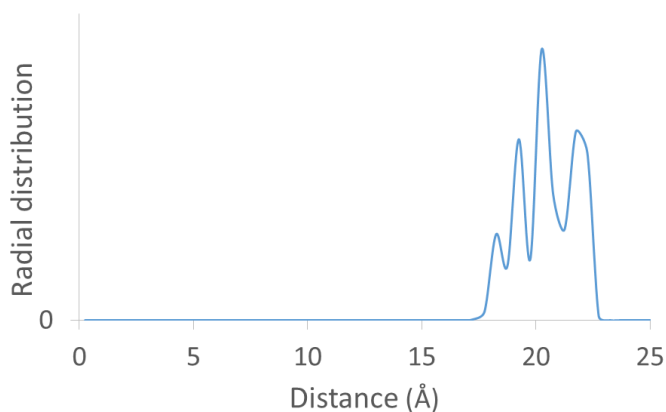

**Figure S9.** Radial distribution function between the nitrogen atoms of the central pyridine ring in different terpyridine arms of Ter-POSS. The graph has been built from 1000 structures generated during a 10-ns MD run at room temperature.

The results of the calculations for O-POSS are presented in Figure S10. Interestingly, the most stable structure exhibits five arms with a Z-conformation around the double bond and three arms with a E-conformation. Such combination allows for strong interactions between some terpyridine groups, as revealed by the radial distribution function analysis, with distances that can be as small as 5 Å. Strong interactions between the terpyridine groups are also found for the Z-isomer while the E-isomer, with its fully

extended arms, only exhibits weak interactions. Even though the E-isomer resembles Ter-POSS, here, contacts at smaller distances are allowed due to the higher flexibility of the arms.

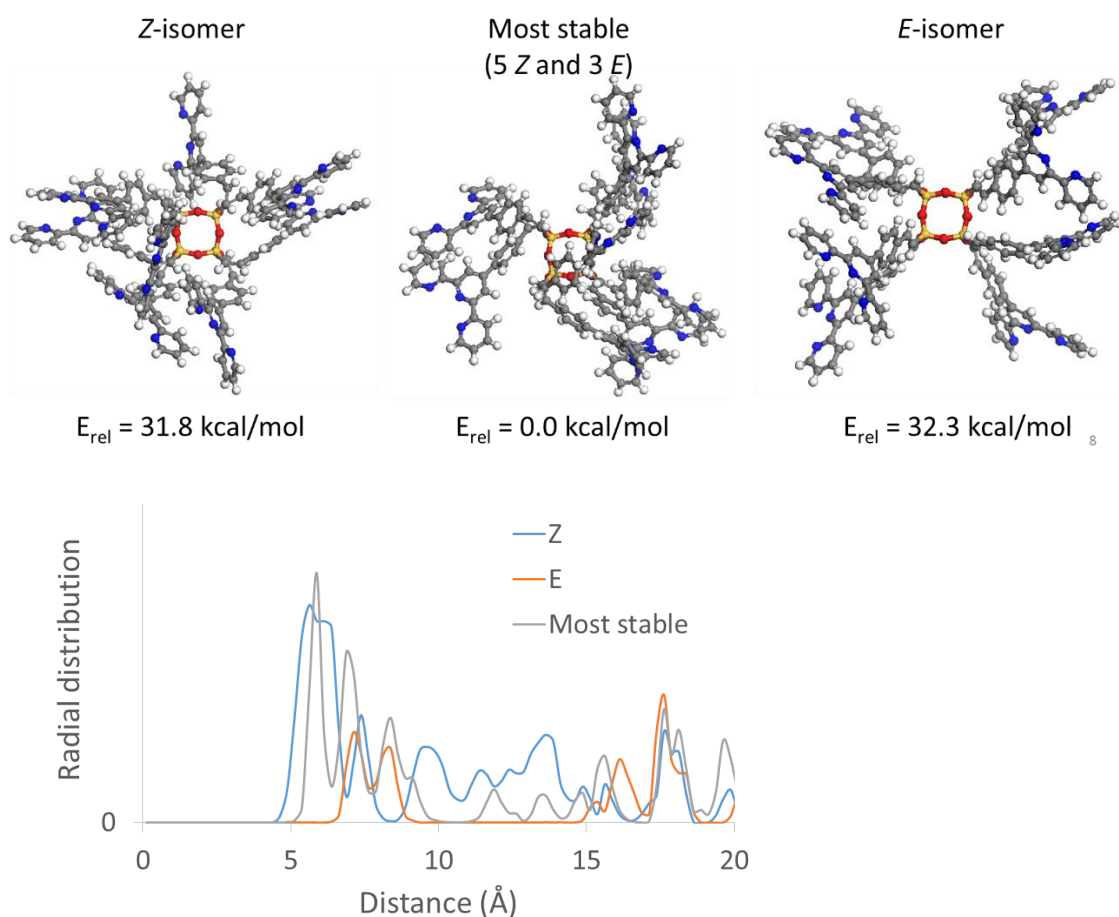

**Figure S10.** Top: representation of the most stable structures of O-POSS and their relative energies (in kcal/mol). Bottom: radial distribution function between the nitrogen atoms of the central pyridine ring in different terpyridine arms. The graphs have been built from 1000 structures generated during a 10-ns MD at room temperature.

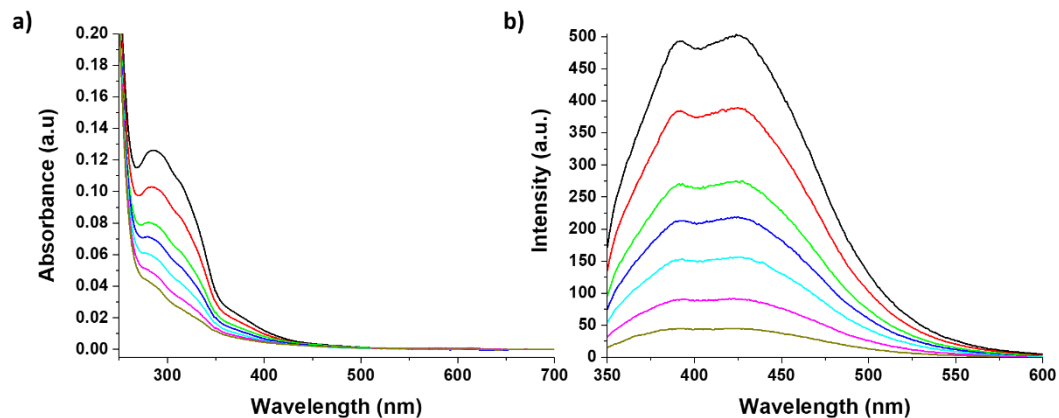

**Figure S11.** (a) UV-vis Absorption spectra of Ter-POSS in  $\text{CH}_2\text{Cl}_2$  in different concentrations. (b) Emission spectra of Ter-POSS.  $\lambda_{\text{ex}} = 330 \text{ nm}$ , Slits = 10 nm.

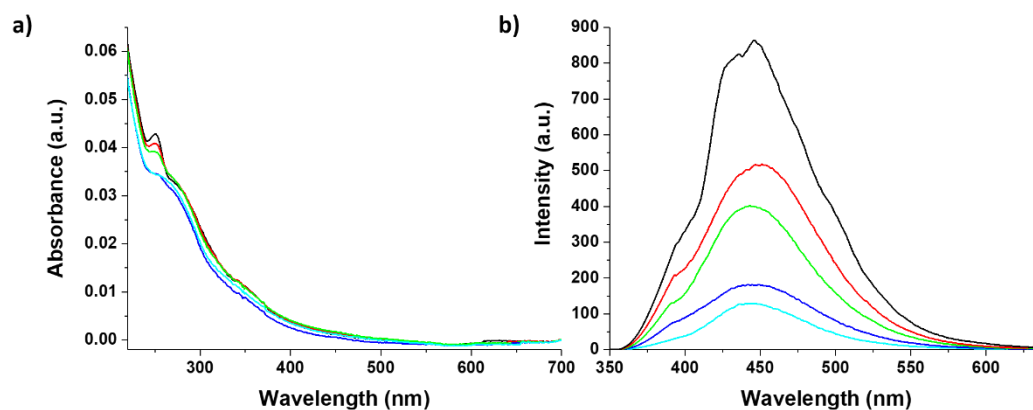

**Figure S12.** (a) UV-vis Absorption spectra of Quinine Sulfate in 0.1M  $\text{H}_2\text{SO}_4$  in different concentrations. (b) Emission spectra of Quinine sulfate.  $\lambda_{\text{ex}} = 330 \text{ nm}$ , Slits = 10 nm.

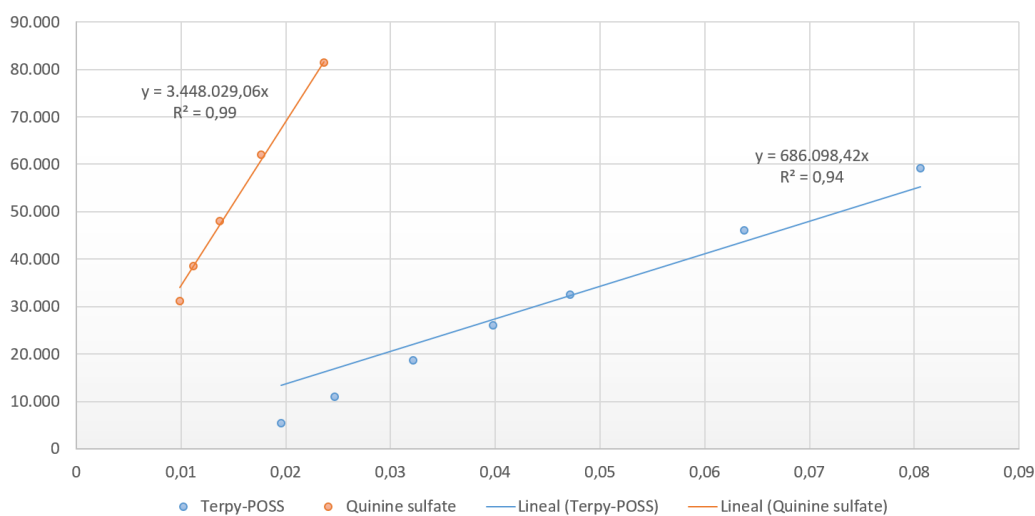

**Figure S13.** Quantum yield Ter-POSS. The graph reports the fluorescence intensity ( $y$ ) vs the absorption intensity at excitation wavelength ( $x$ ).

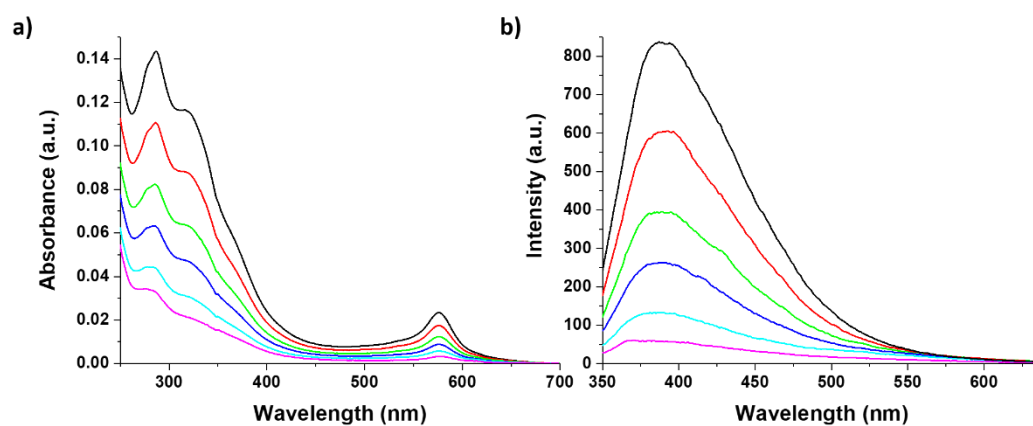

**Figure S14.** (a) UV-vis Absorption spectra of Ter-POSS@4Fe in  $\text{CH}_2\text{Cl}_2$  in different concentrations. (b) Emission spectra of Ter-POSS@4Fe.  $\lambda_{\text{ex}} = 330 \text{ nm}$ , Slits = 10 nm.

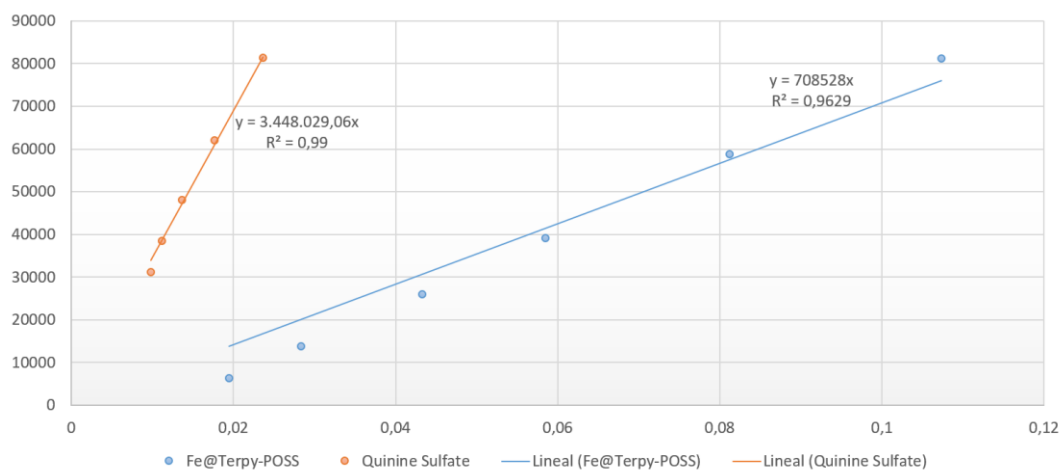

**Figure S15.** Quantum yield Ter-POSS@4Fe. The graph reports the fluorescence intensity (y) vs the absorption intensity at excitation wavelength (x).

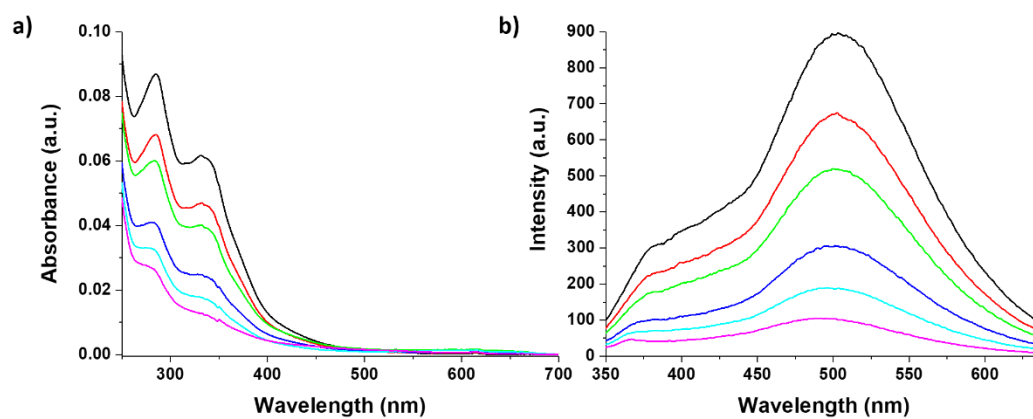



**Figure S16.** (a) UV-vis Absorption spectra of Ter-POSS@4Zn in CH<sub>2</sub>Cl<sub>2</sub> in different concentrations. (b) Emission spectra of Ter-POSS@4Zn.  $\lambda_{\text{ex}} = 330 \text{ nm}$ , Slits = 10 nm.

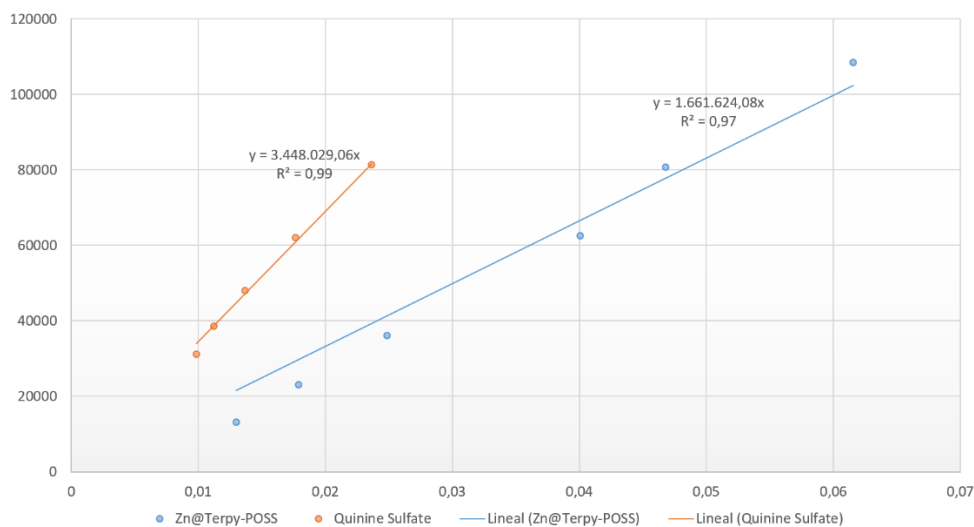

**Figure S17.** Quantum yield Ter-POSS@4Zn. The graph reports the fluorescence intensity (y) vs the absorption intensity at excitation wavelength (x).

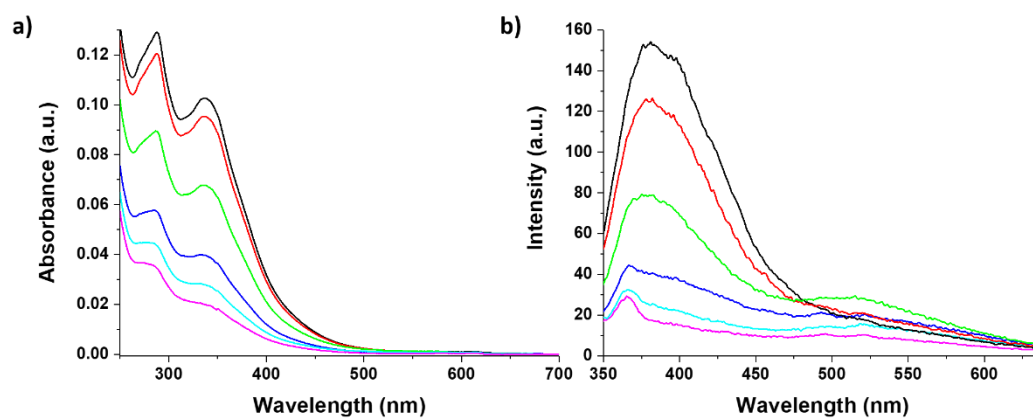

**Figure S18.** (a) UV-vis Absorption spectra of Ter-POSS@4Cu in CH<sub>2</sub>Cl<sub>2</sub> in different concentrations. (b) Emission spectra of Ter-POSS@4Cu.  $\lambda_{\text{ex}} = 330 \text{ nm}$ , Slits = 10 nm.

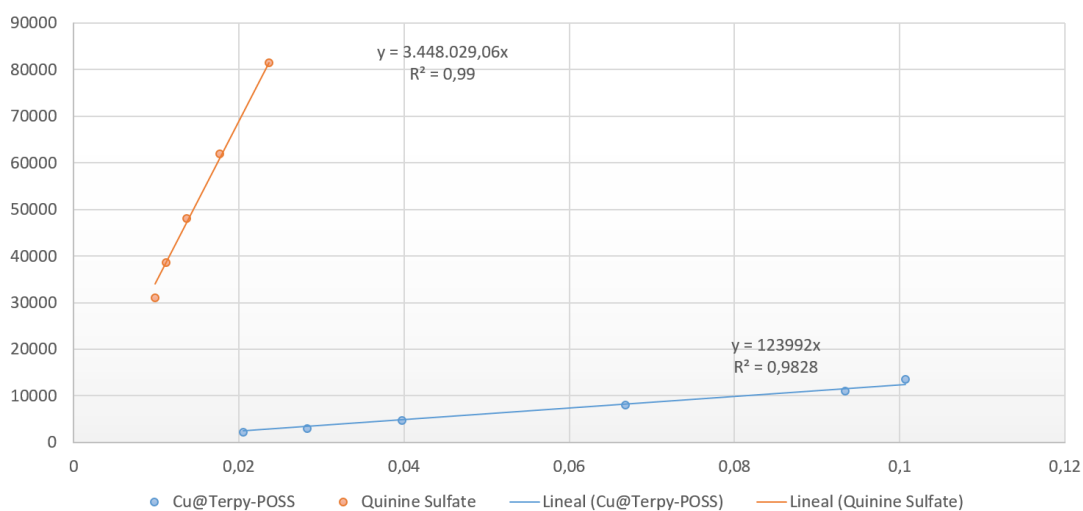

**Figure S19.** Quantum yield Ter-POSS@4Cu. The graph reports the fluorescence intensity (y) vs the absorption intensity at excitation wavelength (x).

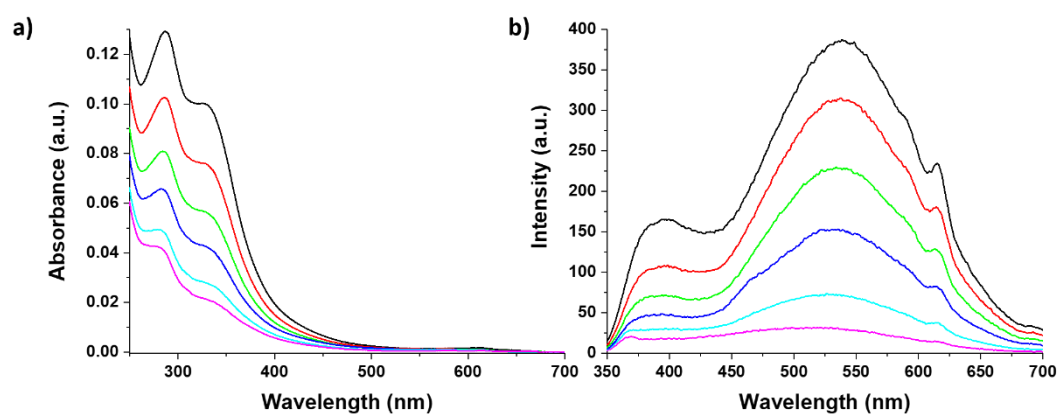

**Figure S20.** (a) UV-vis Absorption spectra of Ter-POSS@4Eu in  $\text{CH}_2\text{Cl}_2$  in different concentrations. (b) Emission spectra of Ter-POSS@4Eu.  $\lambda_{\text{ex}} = 330 \text{ nm}$ , Slits = 10 nm.

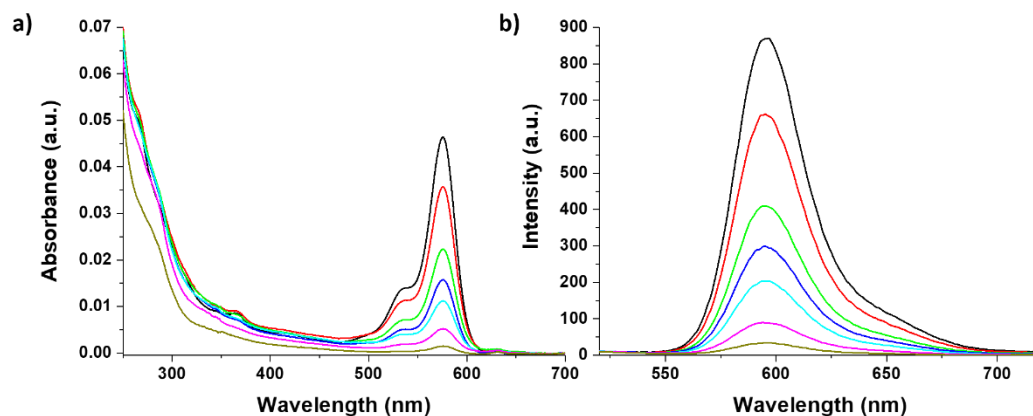

**Figure S21.** (a) UV-vis Absorption spectra of Rhodamine 101 in ethanol + 0.01% HCl in different concentrations. (b) Emission spectra of Rhodamine 101.  $\lambda_{ex}$  = 330 nm, Slits = 10 nm.

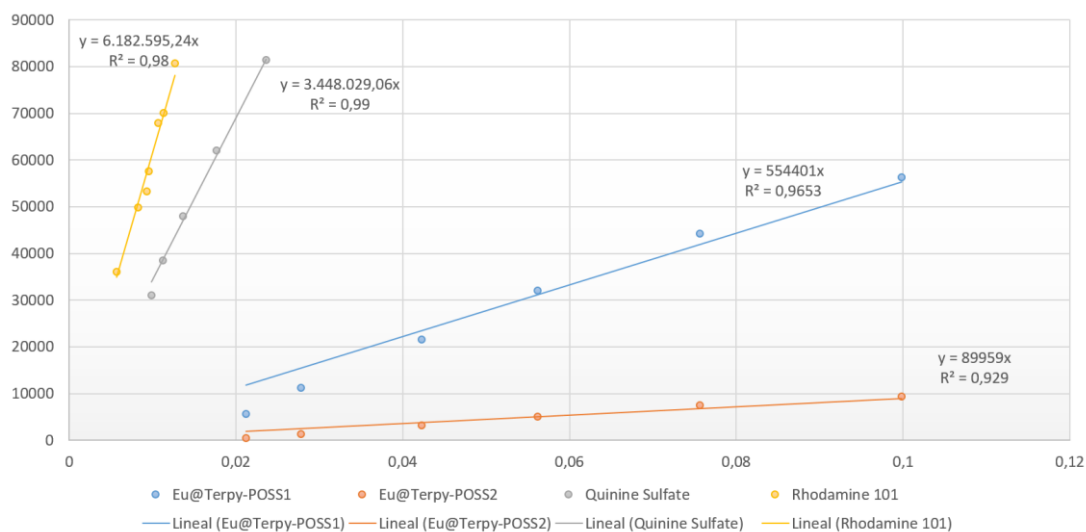

**Figure S22.** Quantum yield Ter-POSS@4Eu. The graph reports the fluorescence intensity (y) vs the absorption intensity at excitation wavelength (x).

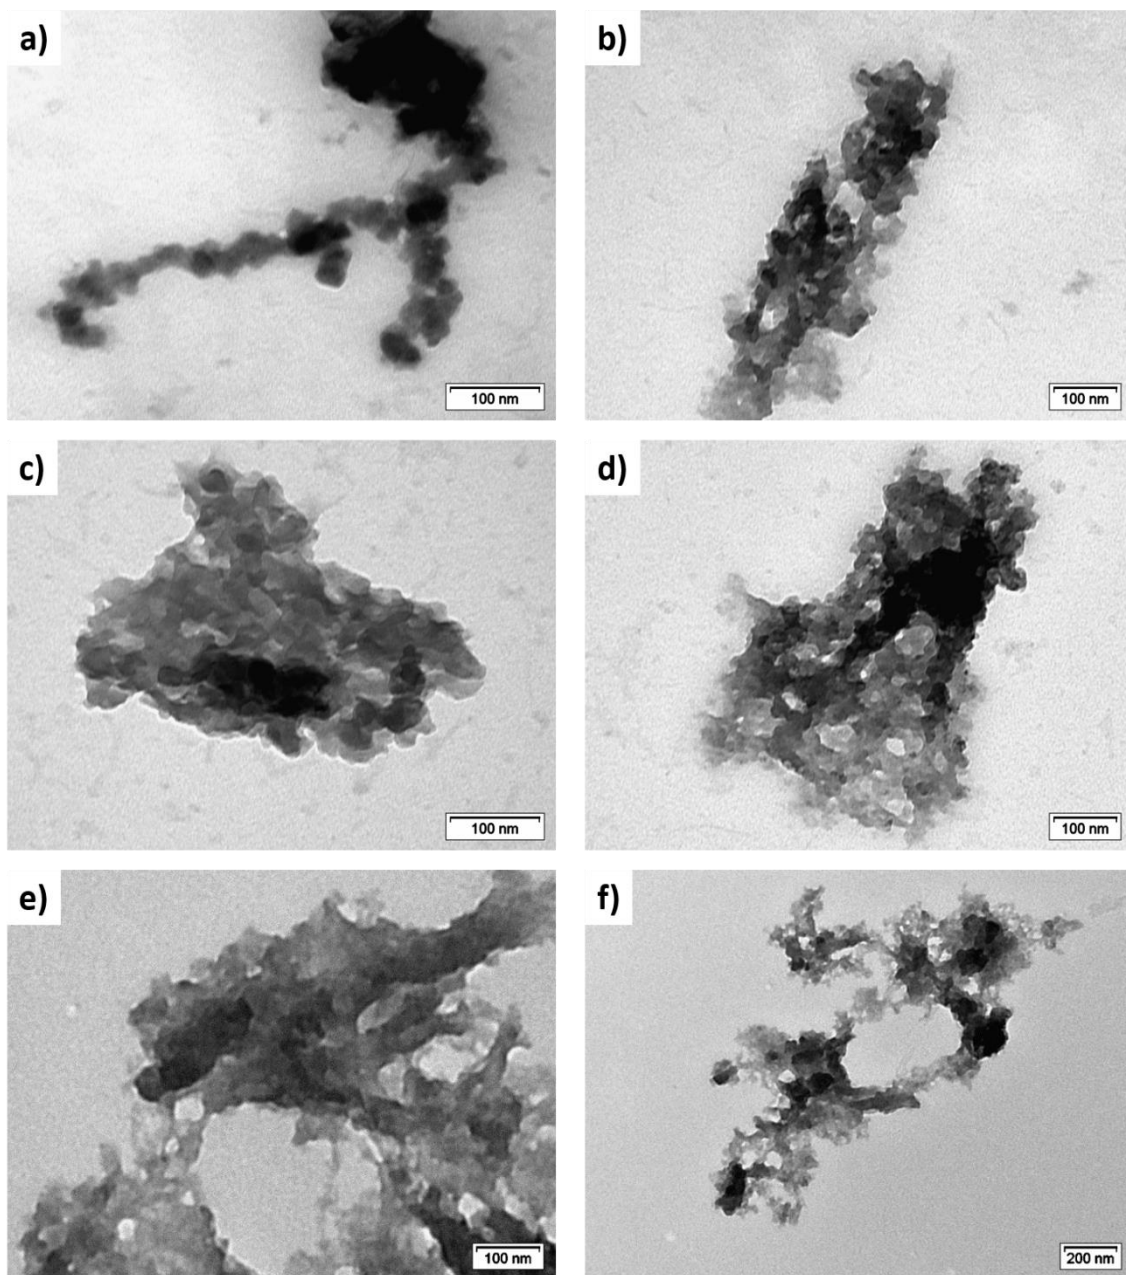

**Figure S23.** Transmission Electron Microscopy images of the lyophilized Ter-POSS@4Zn (a and b), Ter-POSS@4Cu (c and d) and Ter-POSS@4Eu (e and f).
